# Supplementary material
Source: bioRxiv or medRxiv preprint supplement (https://www.biorxiv.org/highwire/filestream/110349/field_highwire_adjunct_files/1/363051-2.pdf)
Supplement: Supplementary file [file 363051-2.pdf]

|                       | SLE Patients<br>(n = 24) | Controls<br>(n = 10) |
|-----------------------|--------------------------|----------------------|
| Age, years            | 34 ± 11                  | 35 ± 7               |
| Female                | 21 (88)                  | 6 (60)               |
| SLEDAI                | 13.5 ± 7                 | ND                   |
| dsDNA IU/mL           | 298 ± 407                | ND                   |
| C3 mg/dL              | 70 ± 25                  | ND                   |
| C4 mg/dL              | 11 ± 7.5                 | ND                   |
| Hydroxychloroquine    | 18 (75)                  | 0                    |
| Mycophenolate mofetil | 16 (67)                  | 0                    |
| Azathioprine          | 3 (13)                   | 0                    |
| Cyclophosphamide      | 1 (4)                    | 0                    |
| Tacrolimus            | 1 (4)                    | 0                    |

**Table S1.** Clinical characteristics of kidney biopsy donors. Age is shown in years. Female sex and medications used in the last 6 months are shown as number of patients, with parentheses indicating percentage of patients. Serum measurements and SLEDAI are shown as average ± standard deviation.
